# Supplementary material for: Gel electrolytes with a wide potential window for high-rate Al-ion batteries
Source: Royal Society of Chemistry journal article supplement (doi:10.1039/c9ta06815e), 2019-01-01
Supplement: c9ta06815e1.pdf [file c9ta06815e1.pdf]

## Supporting Information

### **Gel Electrolytes with Wide Potential Window for High-rate Al-ion Batteries**

Zhijing Yu,<sup>a</sup> Shuqiang Jiao,<sup>a, b, \*</sup> Jiguo Tu,<sup>a</sup> Wei-Li Song,<sup>b, \*</sup> Haiping Lei,<sup>a</sup> Handong Jiao,<sup>b</sup> Haosen Chen<sup>b, \*</sup> and Daining Fang<sup>b</sup>

<sup>a</sup> State Key Laboratory of Advanced Metallurgy, University of Science and Technology Beijing, Beijing 100083, P. R. China.

<sup>b</sup> Institute of Advanced Structure Technology, Beijing Institute of Technology, Beijing 100081, P R China.

### **Corresponding Author**

\*E-mail addresses: sjiao@ustb.edu.cn (S. Jiao), weilis@bit.edu.cn (W. L. Song),  
chenhs@bit.edu.cn (H. Chen)

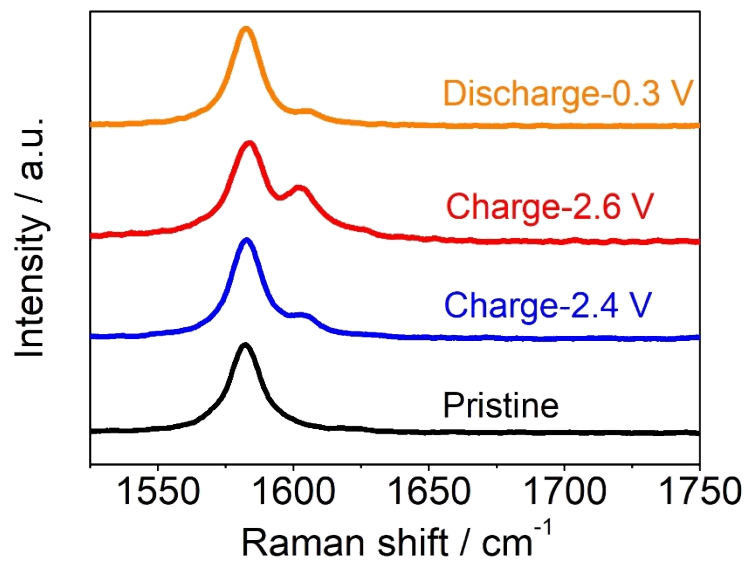

**Fig. S1.** Raman spectra of the positive electrodes: pristine, charged-2.4 V and charged-2.6 V.

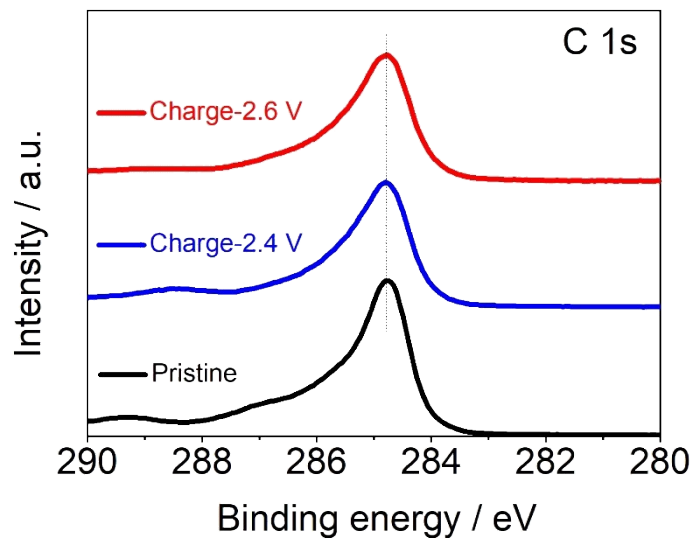

**Fig. S2.** C 1s peak of the graphitic positive electrodes: pristine, charged-2.4 V and charged-2.6 V.

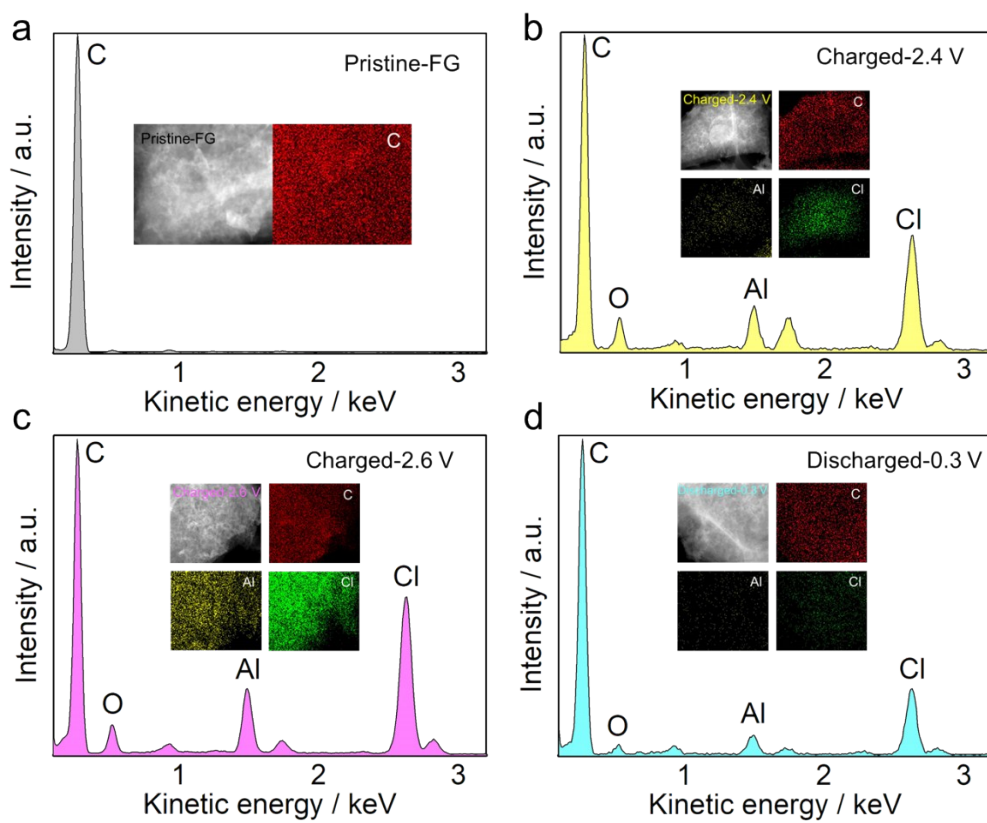

**Fig. S3.** EDS analysis of the graphitic positive electrodes: (a) Pristine, (b) Charged-2.4 V, (c) Charged-2.6 V and (d) Discharged-0.3 V. The insets are the corresponding EDS mapping images.

**Table. S1.** EDS element analysis results of the original positive electrode.

| <b>Element</b> | <b>Weight (%)</b> | <b>Atom (%)</b> |
|----------------|-------------------|-----------------|
| <b>C K</b>     | 100.0             | 100.0           |

**Table. S2.** EDS element analysis results of the charged-2.4 V positive electrode.

| <b>Element</b> | <b>Weight (%)</b> | <b>Atom (%)</b> |
|----------------|-------------------|-----------------|
| <b>C K</b>     | 76.75             | 90.04           |
| <b>Al K</b>    | 5.76              | 3.01            |
| <b>Cl K</b>    | 17.49             | 6.95            |

**Table. S3.** EDS element analysis results of the charged-2.6 V positive electrode.

| <b>Element</b> | <b>Weight (%)</b> | <b>Atom (%)</b> |
|----------------|-------------------|-----------------|
| <b>C K</b>     | 69.58             | 86.21           |
| <b>Al K</b>    | 7.72              | 4.26            |
| <b>Cl K</b>    | 22.70             | 9.53            |

**Table. S4.** EDS element analysis results of the discharged-0.3 V positive electrode.

| <b>Element</b> | <b>Weight (%)</b> | <b>Atom (%)</b> |
|----------------|-------------------|-----------------|
| <b>C K</b>     | 86.08             | 94.5            |
| <b>Al K</b>    | 2.72              | 1.33            |
| <b>Cl K</b>    | 11.20             | 4.17            |



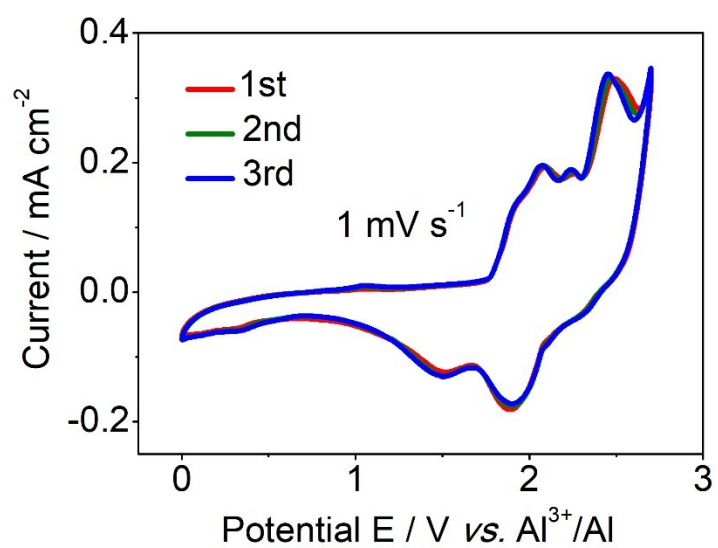

**Fig. S4.** CV curves of the solid-state AIB at a scan rate of 1 mV s<sup>-1</sup> in the voltage range of 0–2.70 V.

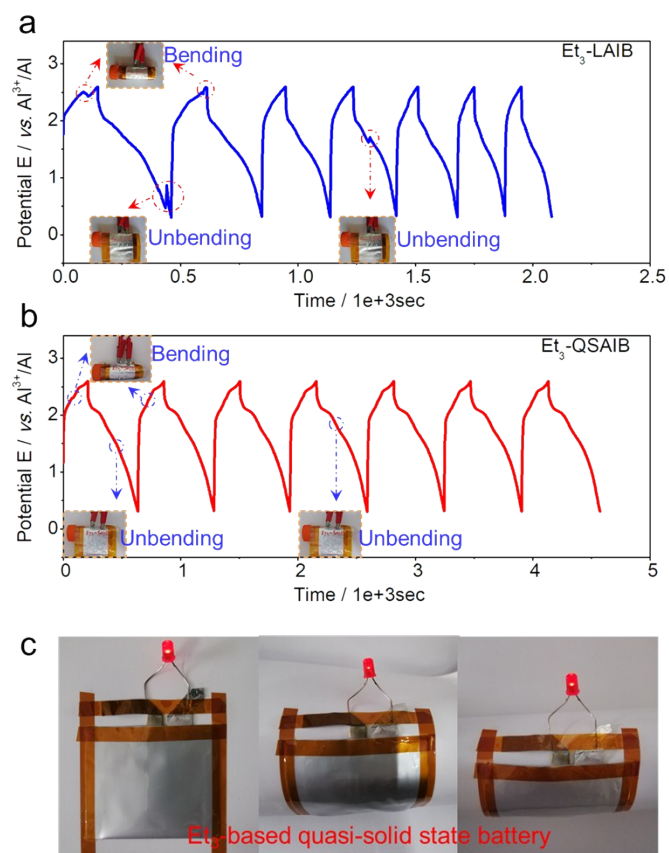

**Fig. S5.** The charge/discharge curves of the  $\text{Et}_3\text{NHCl}$ -based batteries with different bending states: (a) Liquid system, (b) Quasi-solid system. (c) The AIB with  $\text{Et}_3\text{NHCl}$ -based gel electrolytes operating stably under different bending conditions.

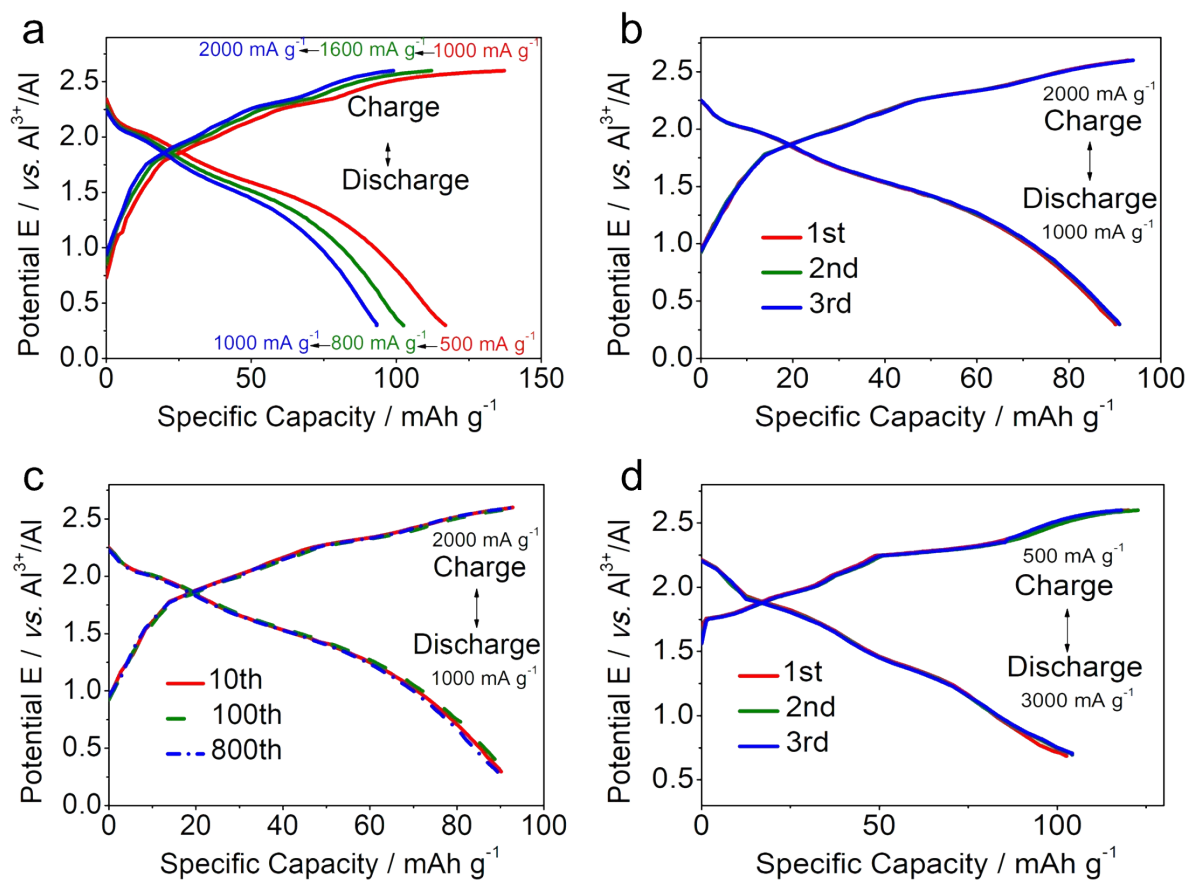

**Fig. S6.** (a) Galvanostatic charge and discharge profiles of the solid-state batteries at different current densities. (b) The initial three charge and discharge curves. (c) The charge and discharge curves at different cycles. (d) The charge and discharge curves at the charge current density of  $500 \text{ mA g}^{-1}$  and the discharge current density of  $3000 \text{ mA g}^{-1}$ .

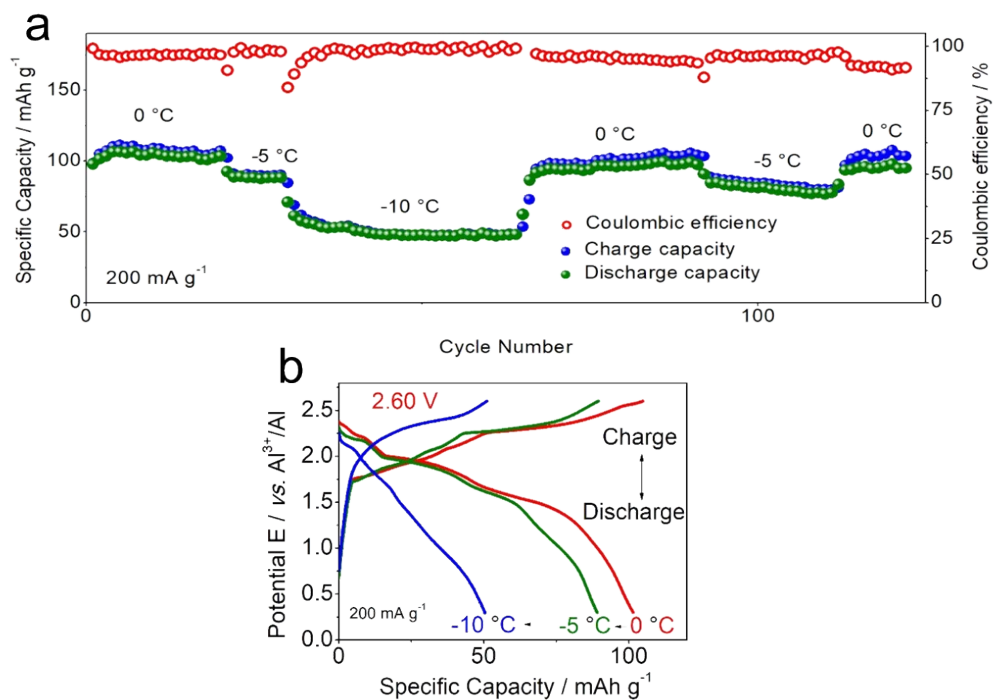

**Fig. S7.** (a) Cycling stability of the solid-state AIBs at lower temperature (current density of  $200 \text{ mA g}^{-1}$ ). (b) The charge and discharge curves at different temperatures (current density  $200 \text{ mA g}^{-1}$ ).

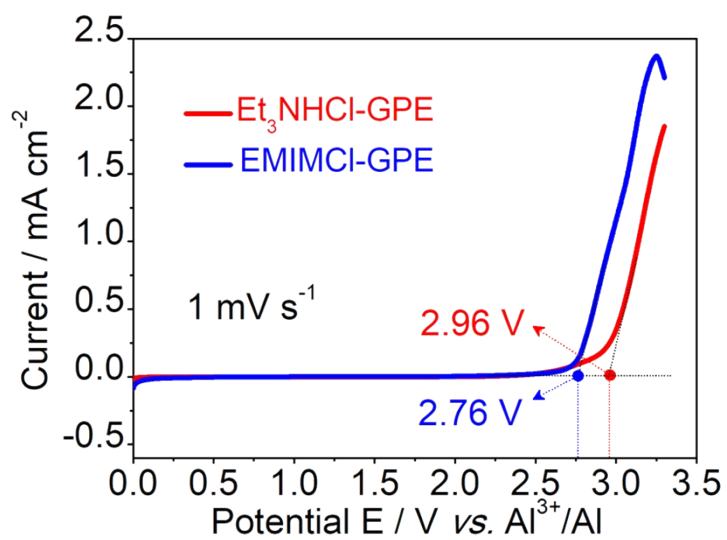

**Fig. S8.** The comparison of the LSV curves of the two kinds of gel-polymer electrolyte systems.

**Table. S5.** The values of the ionic conductivities ( $\sigma$ ) of Et<sub>3</sub>NHCl-based gel-polymer electrolyte with corresponding temperatures

| <b>T / °C</b>                                      | <b>-20</b>            | <b>0</b>              | <b>25</b>             | <b>40</b>             | <b>60</b>             | <b>80</b>             | <b>100</b>            |
|----------------------------------------------------|-----------------------|-----------------------|-----------------------|-----------------------|-----------------------|-----------------------|-----------------------|
| <b><math>\sigma</math> / S<br/>cm<sup>-1</sup></b> | $2.95 \times 10^{-4}$ | $1.04 \times 10^{-3}$ | $4.52 \times 10^{-3}$ | $7.48 \times 10^{-3}$ | $1.07 \times 10^{-2}$ | $1.47 \times 10^{-2}$ | $1.83 \times 10^{-2}$ |

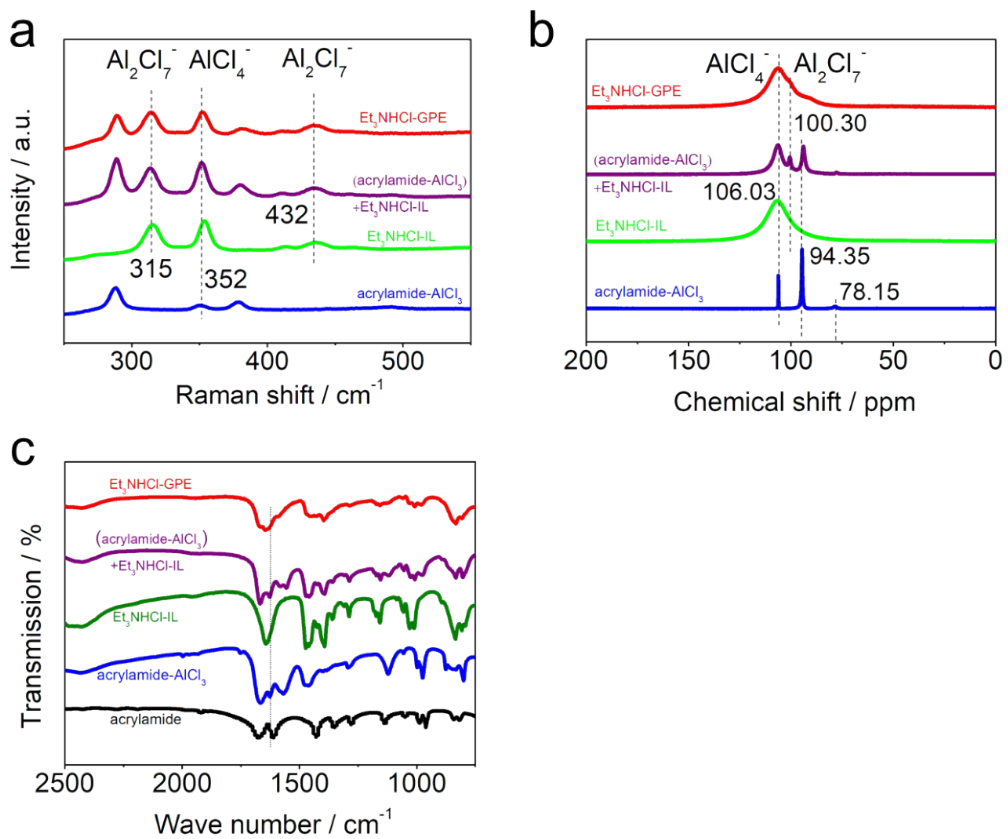

**Fig. S9.** (a) Raman spectra (b)  $^{27}\text{Al}$  NMR spectra (c) FTIR spectra of the samples during preparation.

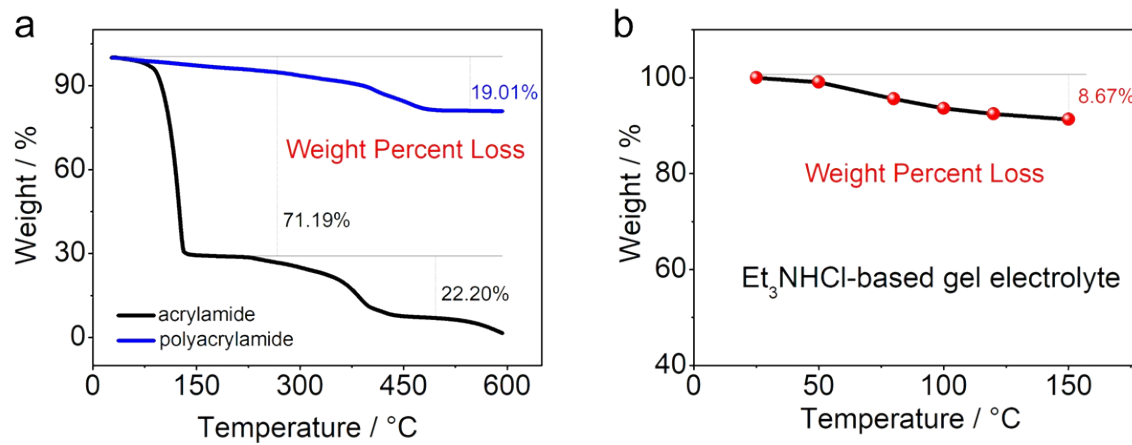

**Fig. S10.** (a) TG curves of monomer and polymer skeleton of the electrolyte. (b) The mass change during the heating process of the Et<sub>3</sub>NHCl-based gel electrolyte.



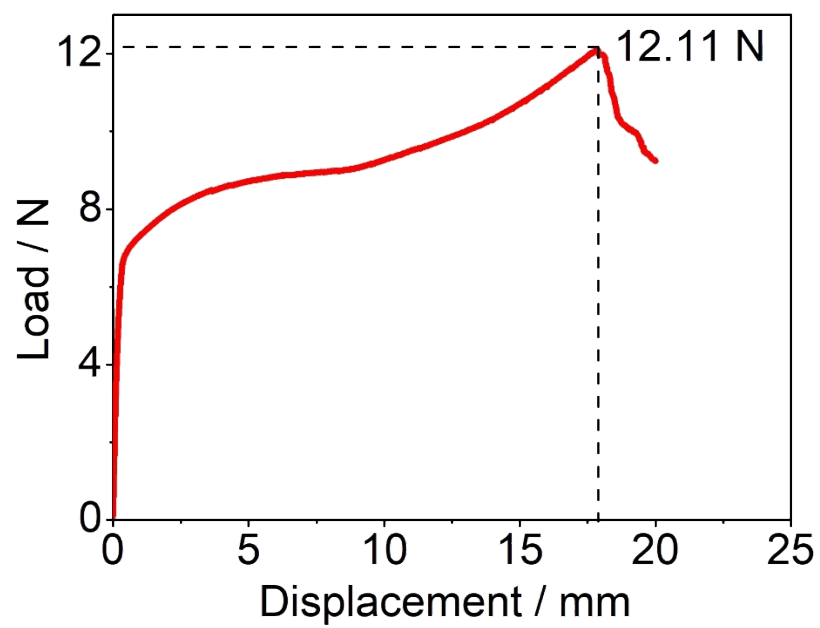

**Fig. S11.** The load-displacement curve of the  $\text{Et}_3\text{NHCl}$ -based gel electrolyte.

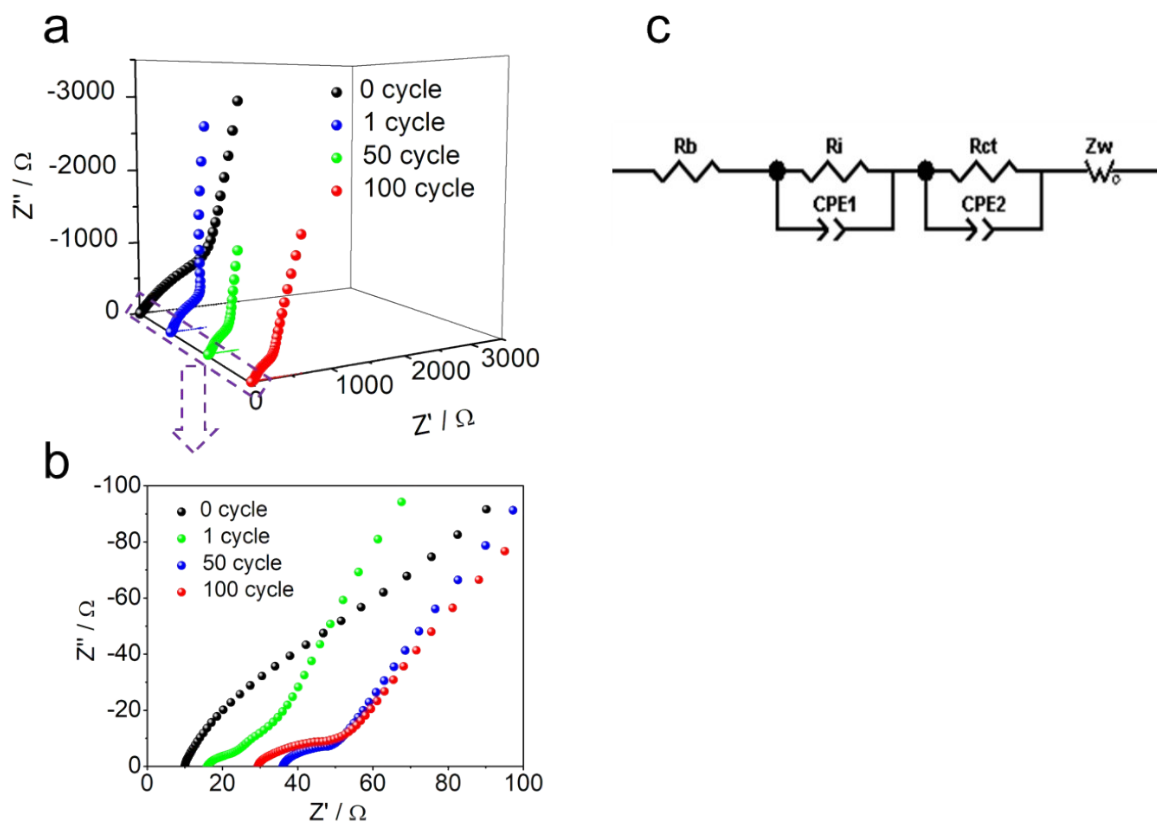

**Fig. S12.** The electrochemical impedance spectroscopy measurements. (a,b) The Nyquist plots of the solid-state battery after 0, 1, 50 and 100 cycles at a frequency range of 100 kHz to 0.01 Hz with an amplitude of 5 mV. (c) Equivalent circuit model of the studied system.
